# Supplementary material for: CXCR4 activation maintains a stem cell population in tamoxifen-resistant breast cancer cells through AhR signalling
Source: PubMed Central journal article supplement — Br J Cancer. 2012 May 29;107(1):43–52. doi: 10.1038/bjc.2012.105 (PMC3389396; doi:10.1038/bjc.2012.105), 2012-05-29

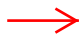

Supplementary Fig. 1

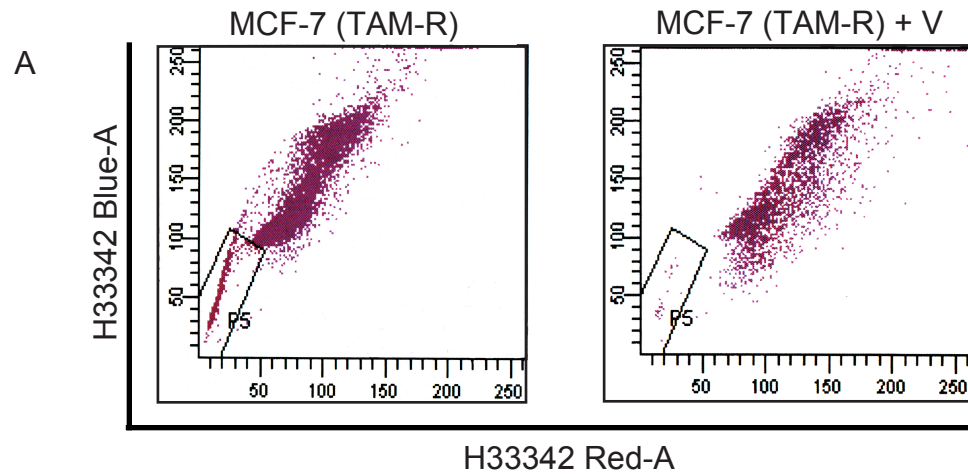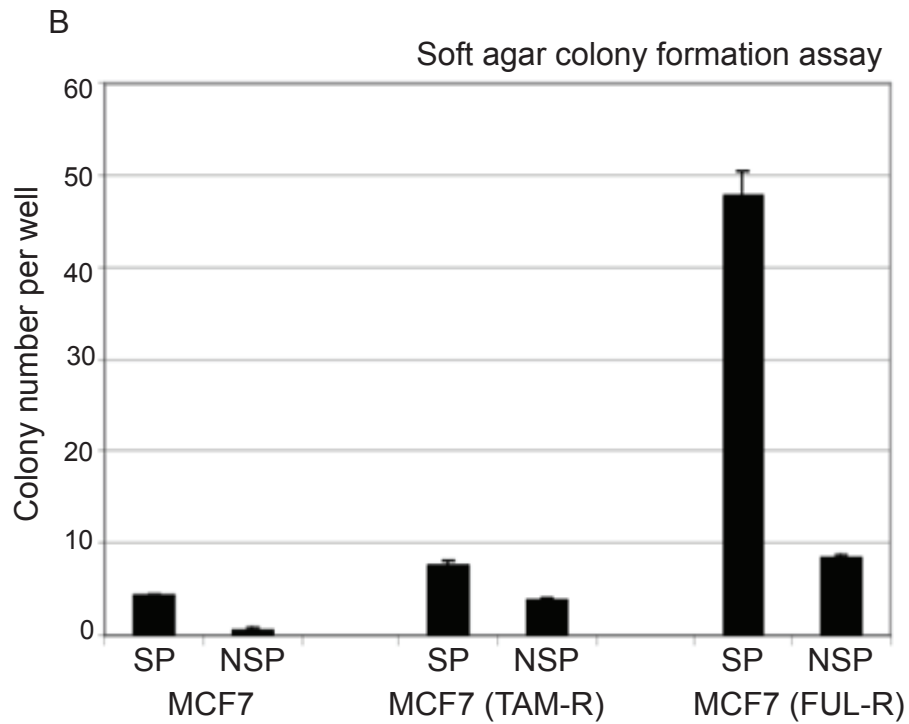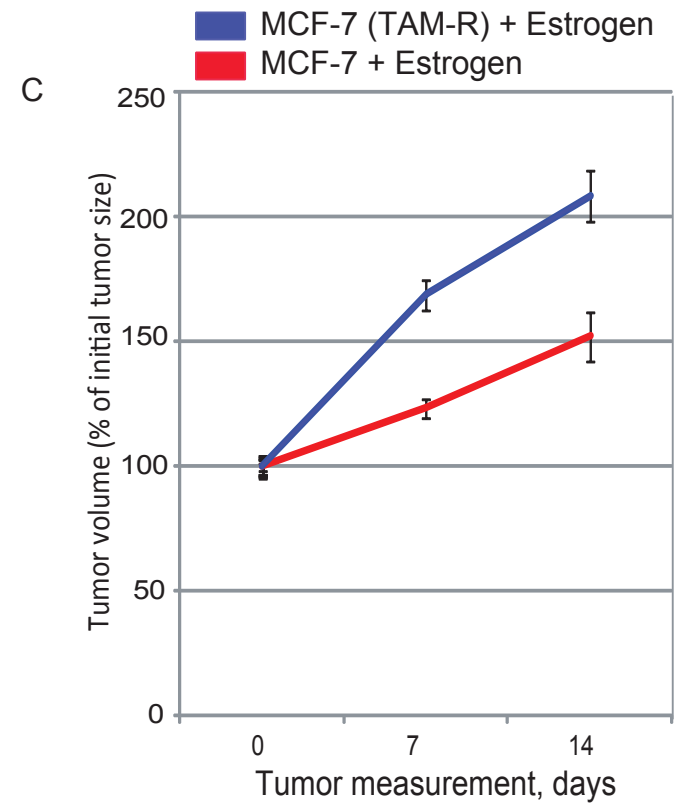

Supplementary Fig. 2

1 - MCF7 + tamoxifen / MCF7+ AMD3100 + tamoxifen

2 - MCF7(TAM-R) + tamoxifen / MCF7(TAM-R) + AMD3100 + tamoxifen

3 - MCF7+estrogen / MCF7+ AMD3100 + estrogen

4 - MCF7(TAM-R) + estrogen / MCF7(TAM-R) + AMD3100 + estrogen

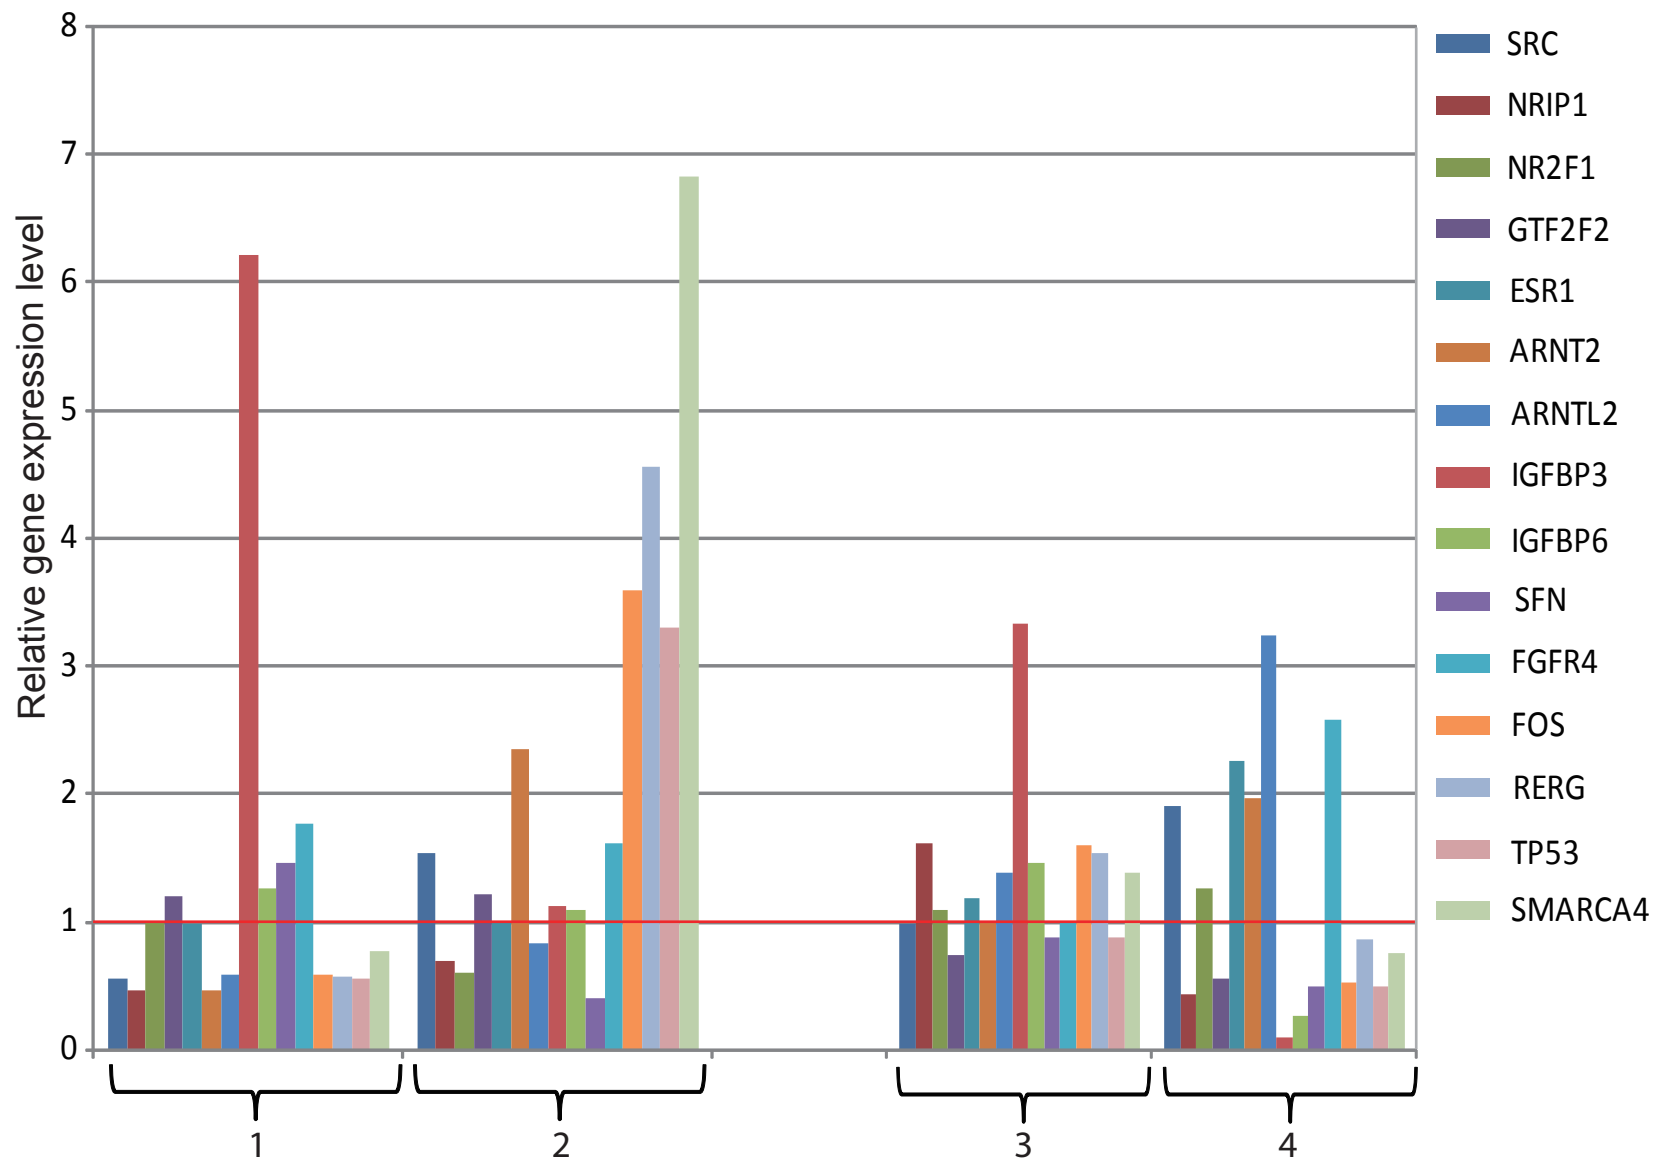

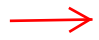

Supplementary Fig. 3

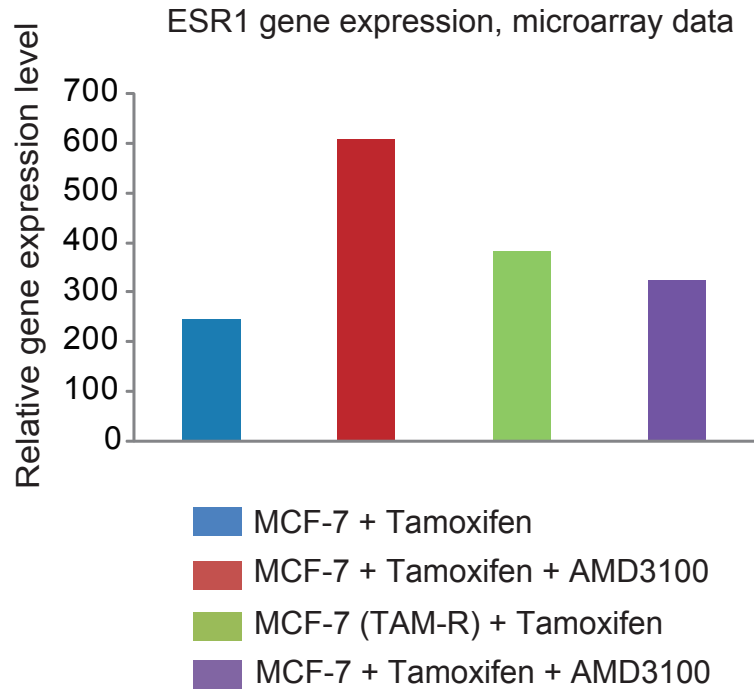

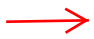

Supplementary Fig. 4

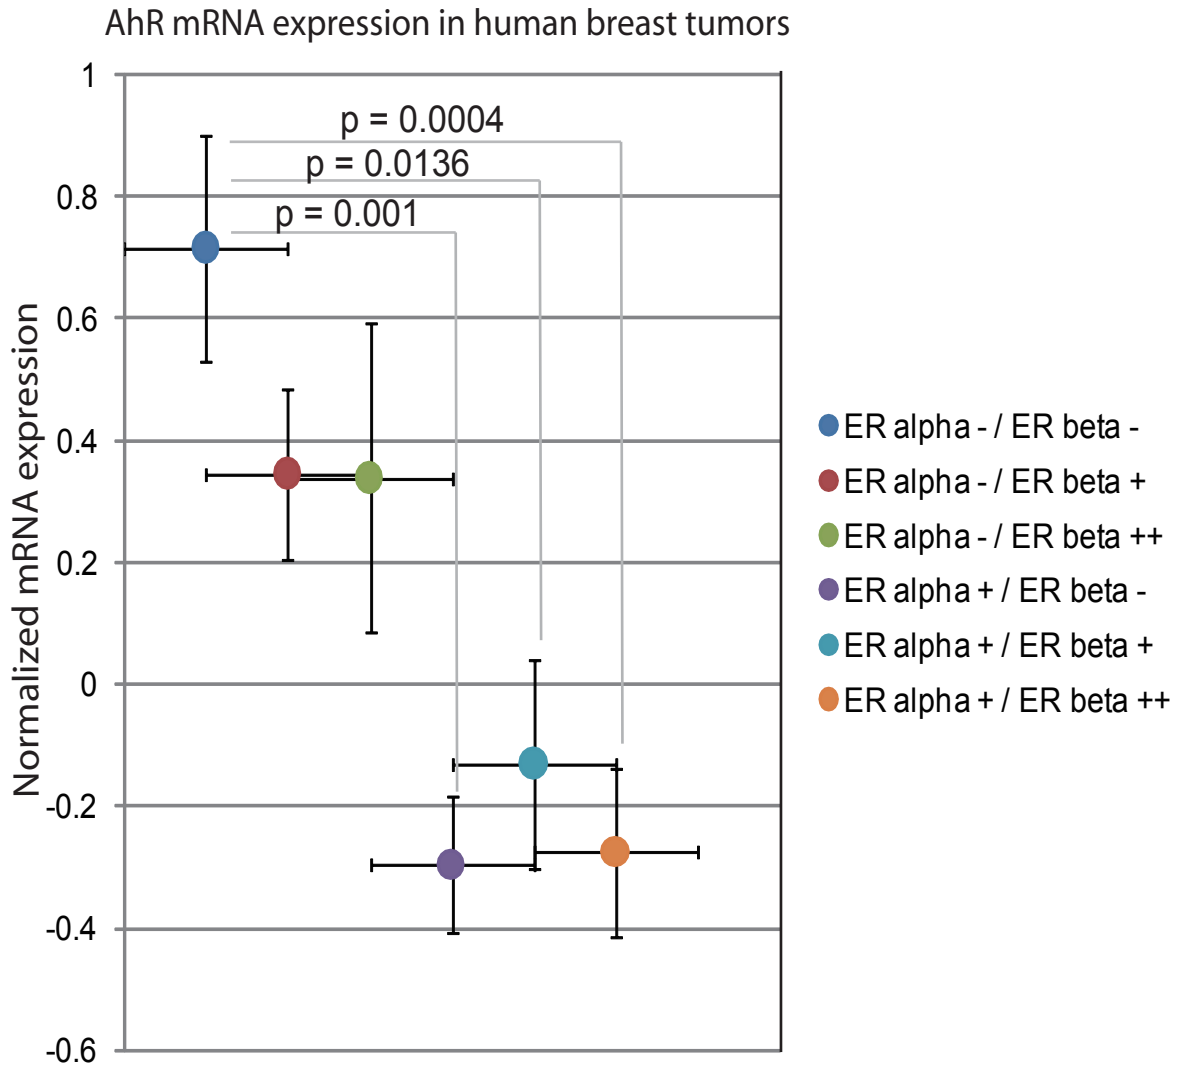

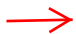

## Supplementary Fig. 5

| Gene name | MCF-7 (TAM-R)+CH-223191/<br>MCF-7 (TAM-R); FC | MCF-7+CH-223191/<br>MCF-7; FC |
|-----------|-----------------------------------------------|-------------------------------|
| ABCC2     | 2.049                                         | 0.646                         |
| CYP2C19   | 2.015                                         | 0.512                         |
| CYP2C8    | 1.049                                         | 2.031                         |
| FGF2      | 3.406                                         | 0.445                         |
| RELB      | 2.226                                         | 1.215                         |
| SULT1E1   | 0.00001                                       | 0.256                         |

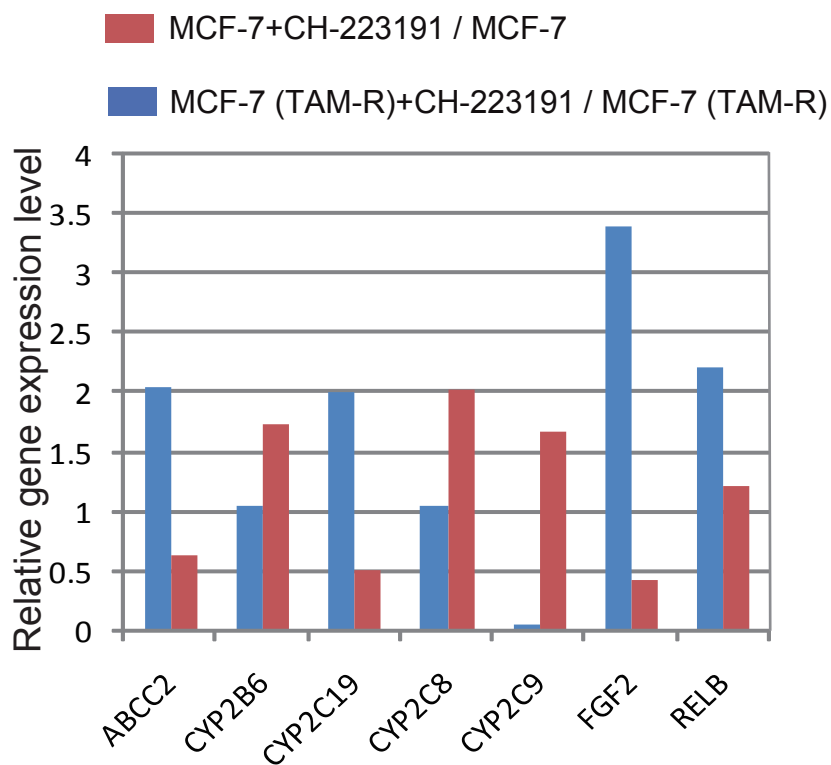

Supplement: bjc2012105x1.pdf [file bjc2012105x1.pdf]
